# Supplementary material
Source: publisher site journal article supplement (https://www.spandidos-publications.com/1415/downloadSupplementary)

Figure S1. Cox regression analysis of the clinical features and the seven differentially expressed long non-coding RNAs risk score.

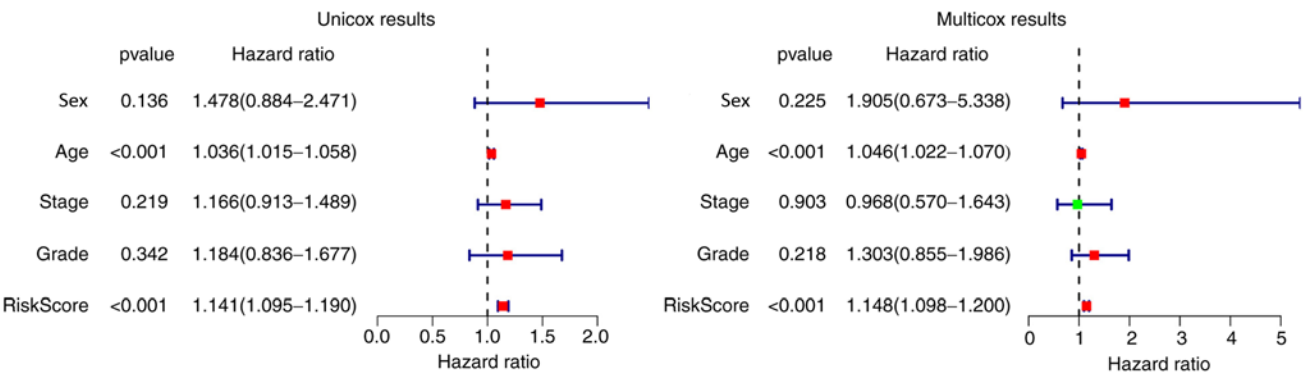

Figure S2. Kyoto Encyclopedia of Genes and Genomes pathway enrichment analysis of genes that were associated with the seven differentially expressed long non-coding RNAs.

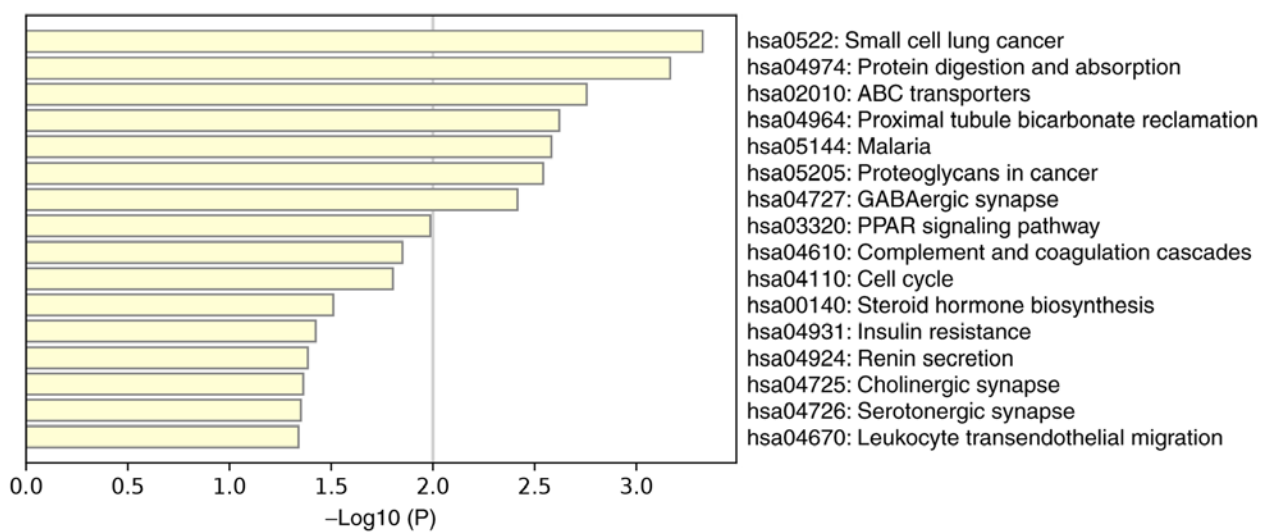

Supplement: Supplementary file 1 [file downloadSupplementary]
